# Supplementary material
Source: publisher site journal article supplement (https://www.dovepress.com/article/579191)
Supplement: Supplementary file 1 [file 579191_Supplementary%20Material.docx]

# Supplementary Material

## Supplementary Material 1

### Methods

This study used baseline data from the NUTRECOVER trial, collected during a measurement day at the MUMC+. These visits included assessments of anthropometrics and body composition, assessed via height and weight (to calculate body mass index (BMI)) and dual-energy X-ray absorptiometry to determine appendicular skeletal muscle mass index (ASMI). , sarcopenia was defined according to the European Working Group on Sarcopenia in Older People (EWGSOP) guidelines, using the following criterion: low muscle quantity (Appendicula Skeletal Muscle Mass Index (ASMI) < 7.0 kg/m² for men and <5.5 kg/m² for women).1 Patients with co-existing obesity (≥ 30 kg/m2) and sarcopenia were classified as having SO.2,3 Physical performance was assessed with the Short Physical Performance Battery (SPPB) for lower extremity function and the Six-Minute Walk Test (6MWT) for exercise capacity.4-6 Physical activity levels over one week were measured using the activPAL accelerometer (PAL Technologies, Glasgow, Scotland). Lung function was evaluated via spirometry. Dietary intake was assessed using a three-day food diary. Each patient received the three-day food diary beforehand and was instructed to complete it for two weekdays and one weekend day, and to bring it to the measurement day. Dietary data were entered into the Voedingscentrum website to calculate the amount of macronutrients of their diet.7 From these data, the average intake over the three days was calculated. Relative macronutrient intake was expressed per kilogram of body weight (g/kg). General health status was assessed using the EuroQol five-dimension questionnaire (EQ-5D).8 Motivation towards exercise was assessed with the Behavioral Regulation in Exercise Questionnaire-2 (BREQ-2), which measures five types of motivation: amotivation, external, introjected, identified, and intrinsic regulation.9 Each subscale is scored from 1 to 5, with higher scores indicating stronger endorsement of that type of motivation. Higher scores on identified and intrinsic regulation reflect more self-determined, favorable motivation, whereas higher scores on amotivation, external, and introjected regulation indicate less autonomous motivation. The individual BREQ-2 subscales were reported separately to allow a more detailed description of participants’ motivational profiles, which was considered relevant for understanding willingness to engage in lifestyle goal setting. Additional methodological details for all measurements are provided in Beijers et al. (2022).10 SES was determined using SES-WOA scores based on 4-digit postal codes.11 The score is based on financial wealth, educational level, and recent employment history of private households on January 1, 2019. The average SES-WOA score for the Netherlands is 0. Positive scores (> 0) indicate a higher-than-average SES and negative scores (< 0) a lower-than-average SES.

### References

1. Cruz-Jentoft AJ, Bahat G, Bauer J, et al. Sarcopenia: revised European consensus on definition and diagnosis. *Age Ageing*. Jan 1 2019;48(1):16-31. doi:10.1093/ageing/afy169

2. Donini LM, Busetto L, Bauer JM, et al. Critical appraisal of definitions and diagnostic criteria for sarcopenic obesity based on a systematic review. *Clin Nutr*. Aug 2020;39(8):2368-2388. doi:10.1016/j.clnu.2019.11.024

3. World Health Organization. Obesity and overweight. Accessed 4-11-2025, <https://www.who.int/news-room/fact-sheets/detail/obesity-and-overweight>

4. Guralnik JM, Simonsick EM, Ferrucci L, et al. A short physical performance battery assessing lower extremity function: association with self-reported disability and prediction of mortality and nursing home admission. *J Gerontol*. Mar 1994;49(2):M85-94. doi:10.1093/geronj/49.2.m85

5. Patel MS, Mohan D, Andersson YM, et al. Phenotypic characteristics associated with reduced short physical performance battery score in COPD. *Chest*. May 2014;145(5):1016-1024. doi:10.1378/chest.13-1398

6. ATS Committee on Proficiency Standards for Clinical Pulmonary Function Laboratories. ATS statement: guidelines for the six-minute walk test. *Am J Respir Crit Care Med*. Jul 1 2002;166(1):111-7. doi:10.1164/ajrccm.166.1.at1102

7. Stichting Voedingscentrum Nederland. Mijn Voedingscentrum <https://mijn.voedingscentrum.nl/nl/registreren/?returnto=%2fnl%2fdashboard%2feetmeter%2f>

8. Pickard AS, Wilke C, Jung E, Patel S, Stavem K, Lee TA. Use of a preference-based measure of health (EQ-5D) in COPD and asthma. *Respir Med*. Apr 2008;102(4):519-36. doi:10.1016/j.rmed.2007.11.016

9. Markland D, Tobin V. A Modification to the Behavioural Regulation in Exercise Questionnaire to Include an Assessment of Amotivation. *Journal of Sport and Exercise Psychology*. 2004;26:191-196.

10. Beijers RJ, van Iersel LEJ, Schuurman LT, et al. Effect of targeted nutrient supplementation on physical activity and health-related quality of life in COPD: study protocol for the randomised controlled NUTRECOVER trial. *BMJ Open*. Mar 16 2022;12(3):e059252. doi:10.1136/bmjopen-2021-059252

11. Centraal Bureau voor de Statistiek. Sociaal-economische status per postcode, 2019. CBS.nl. Accessed 11-6-2025, 2025. <https://www.cbs.nl/nl-nl/maatwerk/2022/26/sociaal-economische-status-per-postcode-2019>

## Supplementary Material 2

This document is an English translation of the original Dutch counseling guidance document used in the study.

**Diet**

*For the first counseling session:*

- *Keep the results of the 3-day food diary available and discuss them with the patient if needed (to provide insight). The participant has also received these results in the results letter from the first assessment day.*
- *The results of the DEXA scan and the participant’s body weight can also serve as a basis for goal setting (e.g., fat mass or muscle mass). Discuss these results with the participant if desired.*
- *Weight management (loss or gain): For example, in case of undernutrition, consider whether nutritional supplementation may be indicated. If the participant is satisfied with their weight, referral to another healthcare professional may be appropriate.*
- *Jointly formulate nutrition-related goals. Leave the initiative for goal setting with the patient. Ask what they would like to work on and where they see opportunities for improvement.*
- *The questions below are intended as inspiration to explore areas for improvement and potential goals. First ask the patient whether they already know what they would like to work on.*

**For the first counseling session:**

1. What does your current eating pattern look like? How many times a day do you usually eat?
2. Do you usually prepare your own meals?
3. What do you think about your current eating pattern?
4. What are you satisfied or dissatisfied with, and why?
5. Do you think anything could be improved in your eating pattern?
6. What would you like to change in your eating pattern?
7. Do you think this is achievable? How do you think you could accomplish this?
   → Formulate feasible goals based on this.
8. Have you tried to make changes before? If so, how did that go? What difficulties did you experience?
9. If the participant does not know how to achieve the goal, provide tips.
10. If the participant does not know what could be improved, provide suggestions based on the food diary results. For example: *I see that you never eat breakfast / always eat white bread / skip meals / eat few vegetables*, etc.
11. Goals may also relate to the Dutch Health Council dietary guidelines, such as intake of vegetables, fruit, whole grains, legumes, nuts, dairy, fish, tea, red meat, processed meat, soft drinks and fruit juice, alcohol, and salt.
12. Are you satisfied with your current body weight? If not, what would you like to change?
13. Do you think this is achievable? How do you think you could accomplish this?
    → Formulate feasible goals based on this.

**For follow-up counseling sessions:**

1. Which goals related to nutrition and body weight have you set? (Check whether the patient still remembers them)
2. What does your current eating pattern look like? How many times a day do you usually eat?
3. Has anything changed in your eating pattern since our last contact? If so, what changed, and how did you achieve this?
4. If no action was taken toward the goal: why not? What barriers did you encounter? How could these be addressed?
5. To what extent are you currently satisfied with your eating habits?
6. If yes: what are you satisfied with?
   If no: what are you dissatisfied with? What would you like to change, and how do you think you could achieve this?
7. What is your current body weight? Has it changed since the last time we spoke? If so, how, and how did you achieve this?
8. Provide tips and adjust goals if necessary. Record these clearly so they can be discussed during the next session.
9. If things are going well and goals have been achieved, consider making the goals slightly more challenging or formulating additional goals if the patient wishes.

**Tips:**

1. The website of the Dutch Nutrition Centre ([www.voedingscentrum.nl](http://www.voedingscentrum.nl)) provides extensive information on healthy eating.
2. Try to limit foods high in salt, sugar, and saturated fat.
3. Try to choose whole-grain products as much as possible, such as whole-grain bread, rice, or pasta.
4. Drinking sufficient water is important.
5. Maintaining a healthy body weight is important for muscle and organ function. If you consume less energy than your body needs, you will lose weight and may become underweight. This can negatively affect your respiratory muscles as well as the muscles in your arms and legs. Maintaining a healthy weight is therefore essential.
6. In case of shortness of breath or fatigue: try eating smaller meals more frequently (e.g., 6–8 times per day). Adopt a comfortable posture while eating and chew thoroughly before swallowing.

**Physical Activity**

*For the first counseling session:*

- *Keep the results of the accelerometer available and discuss these with the patient if needed (to provide insight). The participant has also received these results in the results letter from the first assessment day.*
- *Jointly formulate goals related to physical activity. Leave the initiative for goal setting with the patient. Ask what they would like to work on and where they see opportunities for improvement.*
- *The questions below are intended as inspiration to explore areas for improvement and potential goals. First ask the patient whether they already know what they would like to work on.*

**For the first counseling session:**

1. What does your current physical activity pattern look like? How much do you move on average per day or per week, and what types of activities do you do?
2. Are you currently working? If so, what kind of work do you do (mainly sitting, standing, or physically active)?
3. To what extent are you currently satisfied with your level of physical activity?
4. If yes: what are you satisfied with?
   If no: what are you dissatisfied with? What would you like to change, and how do you think you could achieve this?
5. What difficulties do you experience with physical activity? (For example, motivation to be active or physical limitations related to movement)
6. What have you done so far to address these difficulties? Or how could we work on this together?
7. Example for goal setting: *We see that you take an average of X steps per day. Are you satisfied with this? Do you see any difficulties in increasing this?*
8. Example for goal setting: *We see in the activity data that you spend a lot of time sitting during the day. What do you think about this? Do you think you could reduce this? How?*
   → Formulate feasible goals based on this discussion.

**For follow-up counseling sessions:**

1. Which goals related to physical activity have you set? (Check whether the patient still remembers them)
2. What does your current physical activity pattern look like? How often do you move per day or per week, and what activities do you do?
3. Has this changed or improved compared to our previous conversation? If so, how?
4. To what extent are you currently satisfied with your level of physical activity?
5. If yes: what are you satisfied with?
   If no: what are you dissatisfied with? What would you like to change, and how do you think you could achieve this?
6. What difficulties do you experience with physical activity? (For example, motivation-related or physical difficulties)
7. What have you done to address these difficulties? Or how could we work on this together?
8. Provide tips to help the patient increase physical activity and reduce sedentary behavior in daily life. Adjust goals if necessary.

**Tips:**

1. If increasing physical activity through walking is not feasible (due to COPD or shortness of breath), ask which exercises are performed with a physiotherapist and whether these could also be done at home. If not, light strength exercises for the arms and legs can be suggested, performed while sitting or standing while holding onto a chair.
2. If you do not enjoy exercising alone, you may consider seeking guidance from a physiotherapist who can develop a suitable program with you, possibly including group-based activities.
3. Light to moderate physical activity is already very beneficial. Try to establish a regular routine; even a short walk outdoors after dinner can make a meaningful difference.
4. Try to discover which activities you enjoy and feel most comfortable with. For example, do you prefer cycling, or walking?
5. Gardening or grocery shopping also contribute to daily physical activity.
6. Physical activity is very important for people with COPD. It can reduce the risk of exacerbations and improve physical fitness, leading to less fatigue and more energy. Maintaining muscle mass may reduce COPD-related symptoms. Physical activity may also help you feel more relaxed and improve sleep.
7. In case of more complex or persistent problems, referral to a physiotherapist or another healthcare professional may be appropriate.
8. As many people with chronic conditions may not be able to meet general physical activity guidelines, an individualized approach is important. Any increase in physical activity is beneficial for insufficiently active individuals, regardless of intensity or frequency.
